# Supplementary material for: Electronic, optical and mechanical properties of a novel high-symmetry silicon carbide predicted using first-principles calculations
Source: Research Square preprint supplement (doi:10.21203/rs.3.rs-7734906/v1), 2025-11-04
Supplement: Supplementary file 1 [file a133e8b49d08084faef17721.docx]

Table 1 Calculated bulk modulus (GPa), shear modulus (GPa), Young’s modulus (GPa), Poisson’s ratio and Vickers hardness (GPa) of Pm3n-SiC.

| Structure | Reference | *B*/GPa | *G*/GPa | *E*/GPa |  | /GPa |
| --- | --- | --- | --- | --- | --- | --- |
| Pm3n-SiC | This work | 166 | 110 | 271 | 0.228 | 16.3 |
| 3C-SiC | Ref35 | 225 | 192 | 448 | 0.168 | 33.0 |
|  | This work | 221 | 189 | 441 | 0.167 | 32.8 |
| 4H-SiC | Ref36 | 213 | 184 | 475 | 0.188 | 32.6 |
| 6H-SiC | Ref36 | 215 | 184 | 469 | 0.194 | 32.2 |
